# Supplementary material
Source: PubMed Central journal article supplement (PMC2464336)
Supplement: tjp0586-2523-SD1.pdf [file tjp0586-2523-SD1.pdf]

# Supplemental Figure 1

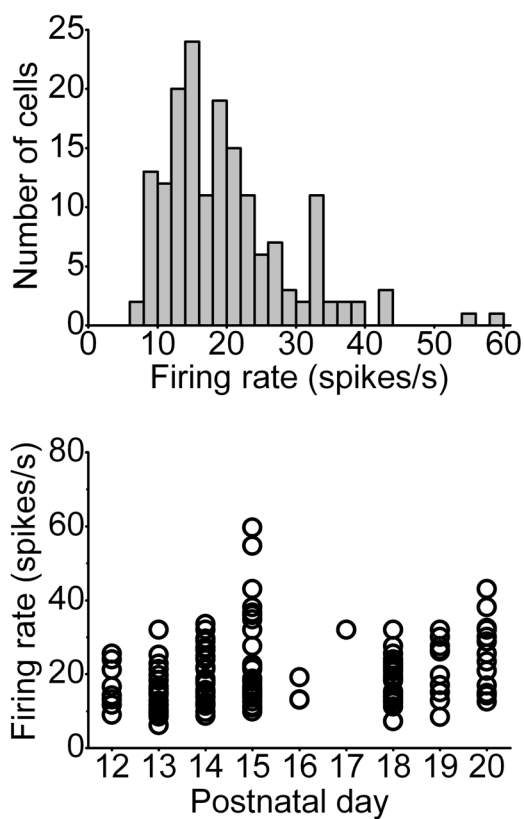

The distribution of the predominant firing rate of DCN neurons in the presence of fast excitatory and inhibitory synaptic blockers. In A, the histogram shows the distribution of firing rates of all cells included in this study (n=167 cells recorded extracellularly). In B, the firing rate of the same cells is plotted against the age of the animal. Each circle represents an individual cell.

## Supplemental Figure 2

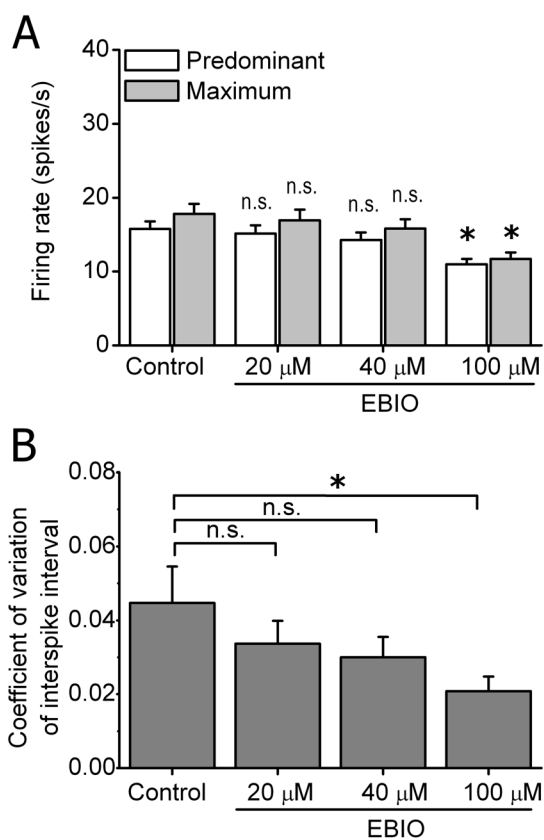

Effect of the SK channel activator EBIO on the firing rate of DCN neurons. In A, the average predominant and maximum firing rate obtained in control and in increasing concentrations of EBIO ( $n = 7$  cells, (\*) denotes  $p < 0.01$  vs Control). In B, the coefficient of variation of the interspike interval obtained from the same cells in A, (\*) denotes  $p = 0.05$  and "n.s." denotes not significant.
